# Supplementary material for: Manmade Electromagnetic Fields and Oxidative Stress—Biological Effects and Consequences for Health
Source: Int J Mol Sci. 2021 Apr 6;22(7):3772. doi: 10.3390/ijms22073772 (PMC8038719; doi:10.3390/ijms22073772)
Supplement: Supplementary file 1 [file ijms-22-03772-s001.xlsx]

## Sheet: S1. RF-EMF animal studies
Reference	Species	Strain	Organ	Frequency (MHz)	Regimen	SAR (W/Kg)	Antioxidant	Oxidative Stress Markers	Tissue Impact
Akbari, Jelodar et al. 2014	Rat	SD	Brain	900	4 hr/day, 45 days	ND	Vitamin C	↓SOD, ↓GPx, ↓CAT, ↑MDA
Al-Damegh 2012	Rat	Wistar	Testis, blood	900-1800-1900a	15, 30 or 60 min/day, 14 days	0.9	Vitamins C and E	↓CAT, ↓GSH, ↓GPx	↑TT
Alkis, Bilgin et al. 2019	Rat	SD	Brain, Blood	900, 1800, 2100 GSM	2 hr/day, 6 months	0.638, 0.166, 0.174	None	↑MDA, ↑TOL, ↓TAL, ↑8-OHdG	↑DNA
Asl, Goudarzi et al. 2011	Rat	Wistar	Brain	950a, 2450	ND	0.9	Rosmarinic acid	↓SOD, ↓CAT, ↓GSH, ↑ROS, ↑ΜDΑ	↑APOP
Asl, Gourdarzi et al. 2020	Rat	Wistar	Brain	915a, 2450	60 min/day, 30 days	ND	Rosmarinic acid	↑PCG, ↑NO, ↑MDA, ↓GSH, ↓GPx, ↓T-AOC, ↓SOD, ↓CAT
Avci, Akar et al. 2012	Rat	Wistar	Blood, brain	1800	1 hr/day, 21 days	0.4	Garlic	↑AOPP (brain), ↑NO (blood), ◆MDA (brain)
Aydin and Akar 2011	Rat	Wistar	Lymphoid organs, blood	900	2 hr/day, 45 days	0.38-0.78 (immature), 0.28-0.48 (mature)	None	↑CAT, ↑SOD, ↓GSH, ↑LP (all tissues, all treated groups), some still altered after 15 days recovery
Aynali, Naziroglu et al. 2013	Rat	Wistar	Laryngotracheal mucosa	2450	1 hr/day, 28 days	0.1	Melatonin	↑LP, ◆GPx
Bedir, Tumkaya et al. 2018	Rat	SD	Kidney	2100	6 or 12 hr/day, 30 days	0.024	None	↑MDA, ↓GSH	↑APOP, ↑TT
Bilgici, Akar et al. 2013	Rat	Wistar	Blood, brain	900 GSM	1 hr/day, 3 weeks	1.08	Garlic	↑MDA, ↑AOPP, ◆NO, ◆PON (brain), ↑NO, ◆MDA, ◆AOPP, ◆PON (blood)
Bodera, Makarova et al. 2017	Rat	Wistar	Brain	1800 GSM	15 min/day, 5 days	0.024-0.028	Tramadol	↓ORAC	Altered NMDA
Bodera, Stankiewicz et al. 2015	Rat	Wistar	Blood, liver, kidney, brain	1800	15 m/day, 5 days	0.024-0.028		↑MDA (blood and brain)	Liver, kidney -
Bouji, Lecomte et al. 2020	Rat	L-E	Brain	900	15 or 45 min/day, 5 d/week, 1 month	1.5, 6	None	↑SH	◆L, ◆SM
Chauhan, Verma et al. 2017	Rat	Wistar	Brain, liver, kidney, testis, spleen	2450	2 hr/day, 35 days	0.14	None	↑LP	↑TT, L+, ΣΠ+
Demirel, Doganay et al. 2012	Rat	Wistar	Brain, blood, eye	900/1800/1900a	20 min speaker, 20 min listener for 20 days	ND	None	◆GSH, ◆CAT	◆TT
Ertilav, Uslusoy et al. 2018	Rat	Wistar	Brain	900, 1800	1 hr/day, 5 d/week, 1 year	0.1	None	↑ROS	↑APOP, altered signaling
Esmekaya, Ozer et al. 2011	Rat	Wistar	Heart, Lung, Testis, Liver	900	20 m/day, 3 weeks	1.2	None	↑ MDA, ↑ NO, ↓ GSH	L+, Lu+
Esmekaya, Tuysuz et al. 2016	Mouse	Swiss with PTZ epilepsy	Brain	900a	15 or 30 min, PTZ, then 30 min	0.301 (head)	None	↑MDA, ↓NO, ↓GSH
Furtado-Filho, Borba et al. 2014	Rat	ND	Liver	950	30 min/day, in utero and to PND 0, 6, 15 or 30	0.06-0.88	None	↓MDA, ↓CAT, ↑LP (neonates), ◆PCG	↓DNA (15 day), ↑DNA (30 day)
Furtado-Filho, Borba et al. 2015	Rat	ND	Brain	950	30 m/day, in utero and 0-6 PND	1.14-1.32	None	◆LP, ↑PCG (only 6 day olds, right cerebral cortex)	◆DNA
Gautam, Singh et al. 2019	Rat	Wistar	Sperm	1950a UMTS	2 hr/day, 45 days	0.26	None	↑ROS, ↑LP	↑TT, ↓CIT
Gumral, Naziroglu et al. 2009	Rat	Wistar	Blood	2450	1 hr/day, 28 days	0.143	Selenium and L-carnitine	↑LP (erythrocyte, plasma), ↓GPx (erythrocyte), ◆GSH, ◆GPx (plasma)
Gumral, Saygin et al. 2016	Rat	Wistar	Heart	2450	1 hr/day, 30 days	0.1	Melatonin	↑MDA, ◆NO, ◆CAT, ↓SOD
Gurler, Bilgici et al. 2014	Rat	Wistar	Brain	2450	1 hr/day, 30 days	0.02	Garlic	◆ MDA, ↑AOPP, ↑8-OHdG
Hanci, Kerimoglu et al. 2018	Rat	SD	Testis	900	1 hr/day, PND 21-60	0.0067	None	↑MDA, ↑SOD, ↑CAT, ◆GSH	↓TW, ↑TT, ↑APOP
Hussein, El-Saba et al. 2016	Rat	ND	Brain	1800a	2 hr/day, 3 months	0.6	None	↑MDA, ↓GPx, ↓CAT, ↓SOD	↑TT, ↑DNA
Ikinci, Mercantepe et al. 2016	Rat	SD	Spinal cord	900	1 hr/day, PND 21-46	ND	None	↑MDA, ↑GSH, ◆CAT, ◆SOD	↑TT, ↑APOP
Ismaiil, Joumaa et al. 2019	Rat	SD/T2DM	Liver	900	24 hr/day, 28 days	ND	None	↑MDA, ↑SOD, ↑↓CAT
Jeong, Son et al. 2018	Mice	C57BL/6	Brain	1950	14 months old, 2 hr/day, 5 d/week, 8 months	5	None	◆8-OHdG, ◆LP	◆APOP, ◆DNA, ◆LA
Kerimoglu, Hanci et al. 2016	Rat	SD	Brain	900	1 hr/day, PND 21-59	0.0093	None	◆MDA, ↑GSH, ↓CAT	↑TT
Kerimoglu, Mercantepe et al. 2016	Rat	SD	Heart	900	1 hr/day, PND 21-59	0.0093	None	↑MDA, ◆SOD, ◆GSH, ◆CAT	↑APOP, ◆TT
Kesari, Kumar et al. 2011	Rat	Wistar	Brain	900 GSMa	2 hr/day, 45 days	0.9	None	↑CAT, ↓SOD, ↓GPx, ↑ROS
Kesari, Kumar et al. 2011	Rat	Wistar	Testis	900 GSMa	2 hr/day, 35 days	0.9	None	↑CAT, ↓SOD, ↓GPx, ↑MDA, ↑ROS	↑TT, ↑DNA
Kesari, Meena et al. 2014	Rat	Wistar	Brain	2115a	2 hr/day, 60 days	0.9	None	↑ROS, ↑SRSP	↑DNA, ↑APOP
Kuybulu, Oktem et al. 2016	Rat	Wistar	Kidney	2450	1 hr/day, in utero, 1 hr/day, PND 18-84	0.1	None	↑MDA, ↑TOS, ↓SOD, ↓TAS, ◆GSH (in utero only)	ΝΑ
Kuzay, Ozer et al. 2017	Rat	Wistar	Testis	2100	20 min/day, 5 days/wk, 1 month	0.23	None	↑MDA, ↑NO, ↓GSH
Liu, Si et al. 2015	Rat	SD	Sperm	900	2 hr/day, 50 days	0.66	None	↓TAS, ↑ROS	↑APOP, associated pathways
Megha, Deshmukh et al. 2012	Rat	Fischer	Brain	900, 1800	2 hr/day, 30 days	5.9x10-4, 5.84x10-4	None	↑MDA, ↑PCG, ↓GSH	↓L, ↓SM, ↑TT
Megha, Deshmukh et al. 2015	Rat	Fischer 344	Brain	900, 1800, 2450	2 hr/day, 5 d/week, 60 days	5.9x10-4, 5.8x10-4, 6.6x10-4	None	↑CAT, ↓GSH, ↓SOD, ↑MDA, ↑PCG	↑INF, ↑DNA
Motawi, Darwish et al. 2014	Rat	Wistar	Brain	900 GSMa	2 hr/day, 60 days	1.13	None	↓TAL, ↓TOL, ↑OSI	↑ APOP, ◆ DNA, ↑ TT
Odaci, Unal et al. 2015	Rat	SD	Kidney	900	1 hr/day, GD 13-21, examined PND 21	0.024	None	↑MDA, ↓CAT, ↓SOD	↑TT
Okatan, Kulaber et al. 2019	Rat	SD	Liver	900	1 hr/day, PND 35-59	0.0096	None	↓SOD, ↓8-OHdG, ◆MDA, ◆GSH, ◆TAS, ◆TOS, ◆OSI	↑TT, ↑APOP
Okatan, Okatan et al. 2018	Rat	SD	Kidney	900	1 hr/day, PND 35-59	0.012	None	◆TOS, ◆OSI	↑TT
Oksay, Naziroglu et al. 2014	Rat	Wistar	Testis	2450	1 hr/day, 30 days	0.1	Melatonin	↑LP, ◆GSH, ◆GPx
Othman, Ammari et al. 2017	Rat	Wistar	Brain	2450a	2 hr/day, 20 days	ND	None	↑MDA, ↓SH, ↑CAT	◆L, ◆SM
Othman, Ammari et al. 2017	Rat	Wistar	Brain	2450a	2 hr/day during gestation	ND	None	↑MDA, ↑SH, ↑CAT, ↑SOD	↓SM
Oyewopo, Olaniyi et al. 2017	Rat	Wistar	Testis	900-1800a	1,2,3 hr/day, 28 days	ND	None	↑MDA, ↓SOD	↑TT, ↓GH
Ozorak, Naziroglu et al. 2013	Rat	Wistar	Kidney, testis	900, 1800, 2450	1 hr/day, in utero and 4, 5 or 6 weeks, 5 days per week	0.18 (0.01-1.2)	None	↓LP (4 and 6 wk), ↓GSH (all)	k+
Pandey and Giri 2018	Mouse	Swiss	Sperm, Testis	900 GSM	3 hr twice/day, 35 days	0.0054 – 0.0516	Melatonin	↑GSH, ↓SOD	↑TT, ↑DNA
Pandey, Giri et al. 2017	Mouse	Swiss	Spermaocytes	900	4, 8 hr/day, 35 days	0.0045-0.0516	None	↑ mitochondrial damage	↑TT, ↑DNA
Ragy 2015	Rat	SD	Brain, liver, kidney	900	1 hr/day, 60 days	ND	None	↑MDA, ↓TAS (eliminated after 30 days)	↑TT (demonstrated by blood chemistry)
Sahin, Ozgur et al. 2016	Rat	Wistar	Brain	2100	6 hr/day, 5 days/w, 2 and 8 weeks	0.4	None	2 weeks: ↑8-OHdG , ◆LP; 8 weeks: ↓LP	↑DNΑ
Sangun, Dundar et al. 2015	Rat	Wistar	Ovary, brain	2450	1 hr/day in utero and/or 1 hr/day PND 21 to puberty	0.1	None	↑TOS, ↑OSI	↑SH, ◆TT
Shahin, Banerjee et al. 2018	Mouse	Swiss	Hypocampus	2450	2 hr/day, 15, 30, and 60 days	0.0146	None	↑SH	↓L, ↓SM
Shahin, El-Nabarawy et al. 2019	Rat	Wistar	Testis	900	2 hr/day, 8 weeks	1.075	Spermine	↑MDA, ↓GPx	↑APOP, ↑DNA, ↑INF
Shahin, Mishra et al. 2014	Mouse	Swiss	Liver, kidney, hypothalmus, testis	2450	2 hr/day, 30 days	0.018	None	↑ROS, ↑NO, ↑MDA, ↓SOD, ↓GPx, ↓CAT	↑TT (testis only, other not examined)
Shahin, Singh et al. 2013	Mouse	Parkes	Liver, kidney, ovary, blood, brain	2450	2 hr/day, 45 days	0.023	None	↑ROS, ↓SOD, ↓CAT, ↓GPx (liver, kidney, ovary)	↑BC, ↑DNA (brain)
Shahin, Singh et al. 2017	Mouse	Swiss	Ovaries, uterus, hypothalmus	1800a	3 hr/day, 100 days	ND	None	↑ROS, ↑MDA, ↓SOD, ↓CAT, ↓GSH	↑TT
Shahin, Singh et al. 2018	Mouse	Swiss	Testis	1800a	3 hr/day, 120 days	0.05	None	↑ROS, ↑MDA, ↑NO, ↓SOD, ↓CAT, ↓GPx	↑APOP, ↑TT, ↓CIT
Sharma and Shukla 2020	Rat	Wistar	Brain	900	1, 2, 4 hr/day, 90 days	0.231	None	↑MDA, ↓SOD, ↓CAT	↑TT, ↓L, ↓SM
Sokolovic, Djordjevic et al. 2015	Rat	Wistar	Testis	900 GSMa	4 hr/day, 20, 40 or 60 days	0.043-0.135	Melatonin	↑MDA, ↓CAT, ↑PCG, ↑XO, ↑AD, ↑AcD
Tan, Wang et al. 2017	Rat	Wistar	Brain	1500, 2856	6 minutes	1.7 to 3.7	None	↓SOD (multiple days observed, interaction effects)	↓L, ↓SM, ↑TT
Tok, Naziroglu et al. 2014	Rat	Wistar	Eye lens	2450	60 m/day, 30 days	0.1	Melatonin	◆LP, ↓GPx, ◆GSH
Tumkaya, Yilmaz et al. 2019	Rat	SD	Liver	1800	6, 12, 24 hr/day, 20 days in-utero, PND 60	0.12	None	↑MDA, ↓GPx, ↑TOL, ↓TAL	↑TT
Turedi, Hanci et al. 2015	Rat	SD	Heart	900	1 hr/day, GD 13-21, examined PND 21	0.025	None	↑MDA, ↑SOD, ↑CAT, ↓GSH	↑TT, ↑APOP
Turedi, Kerimoglu et al. 2017	Rat	SD	Kidney, Bladder	900	1 hr/day, PND 22-59	0.0067	None	↑MDA	↑APOP, ↑TT
Varghese, Majumdar et al. 2018	Rat	SD	Brain	2450	4 hr/day, 45 days	0.047W	None	↓SOD, ↓CAT, ↓GSH, ↑LP	↑APOP, ↑TT
Yuksel, Naziroglu et al. 2016	Rat	Wistar	Uterus, blood	900, 1800, 2450	1 hr/day, 5 d/week, 52 weeks	0.1	None	↑LP, ◆GSH	↓RH
Zhu, Cui et al. 2016	Rat	Wistar	Heart	2450	6 min	50, 100, 150, 200 mW/cm2	None	↑SOD, ↑GSH, ↓MDA	↑TT, ↑APOP
Zong, Ji et al. 2015	Mouse	ICR	Blood, liver, lung	900	4 hr/day, 7 days	0.05	Bleomycin	◆MDA, ◆SOD	◆DNA

## Sheet: S2. RF-EMF cell studies
Reference	Cell Line	Source	Organ/tissue	Frequency (MHz)	Time	SAR (W/Kg)	Antioxidant/ co-treatment	Oxidative stress marker	Other results
Campisi, Gulino et al. 2010	primary	Rat	Astrocytes	900 GSM or CW	5, 10, 20 min	ND (0.26 W/cm2)	None	↑ROS (20 min GSM)	↑DNA (20 min GSM)
Choi, Min et al. 2020	ASC Huh7, Hep3B HeLa SH-SY5Y IMR-90	Human	Adipose stem cell liver cancer cervix cancer brain/neuroblastoma lung fibroblast	1700	72 hr	1, 2	N-acetyl-L-cysteine	↑ROS (ASC and Huh7)	↓CP, ◆APOP, ◆DNA, induced senescence
Cig and Naziroglu 2015	MCF-7	Human	Breast Cancer	900, 1800, 2450	1 hr prior capsaicin stimulation	0.36 and less	None	↑ROS	↑CA, ↑APOP, ↑C3, ↑C9
Ding, Sun et al. 2018	Spermatozoa	Human	Sperm	2450	45, 90 min	1.0–2.5	Trolox	↑ROS, ↓GPx, ↓SOD, ↑8-OHdG	↑DNA
Duan, Liu et al. 2015	GC-2	Mouse	spermatogenic cells	1800 GSM (50 Hz)	24 hr	1, 2, 4	None	↑oxDNA (4 W/kg)	◆APOP, ◆DNA
Durdik, Kosik et al. 2019	lymphocytes, HSPC, HSC	Human	Umbilical cord blood, sorted	900 GSM or UMTSa	1-3 or 17 hr	0.04 (0.004)	None	↑ROS (1 hr) ◆ROS (3 hr)	◆DNA, ◆APOP
Falzone, Huyser et al. 2010	Spermatozoa	Human	Sperm	900 GSM	1 hr (0, 2, 24 hr post exposure analysis)	2, 5.7	None	◆ROS	◆APOP
Friedman, Kraus et al. 2007	Rat1 HeLa	Rat Human	Embryonic fibroblast Cervix cancer		5, 10, 15, 20, 30 min	ND (0.005-0.31 mW/cm2)	N-acetyl-L-cysteine signaling inhibitors	↑NOX	↑ERK signalling ↑EGF receptor
Gläser, Rohland et al. 2016	HSC HL-60	Human	Hematopoietic Stem Cells leukemic promyelocytes	900 GSM, 1950 UMTS, 2535 LTE	4 h, 20 h, 60 h (sham not concurrent)	0.5, 1, 2, 4	None	◆ROS	◆APOP, ◆DNA, ◆CC ↓DNA (GSM, 4 hr, HSC)
He, Liu et al. 2014	N9	Mouse	Microglia	2450a	20 min	6	Curcumin	↑NO	↑PIC, ↓phagocytosis
He, Luo et al. 2016	N9	Mouse	Microglia	2450a	20 min	6	None	↑NO	↑PIC, ↓phagocytosis ↓↑signaling
Hong, Kim et al. 2012	MCF10A	Human	Mammary epithel	837 or 1950	2 hr (measured 10, 24 or 48 hr after exposure)	4	None	◆ROS, ◆GSH, ◆SOD
Hou, Wang et al. 2015	NIH/3T3	Mouse	Embryo	1800	0.5, 1, 1.5, 2, 4, 6, 8 hr	2	None	↑ROS	↑APOP
Houston, Nixon et al. 2018	GC-1, GC-2 Spermatozoa	Mouse	Spermatogenic cells Sperm	1800	Up to 6 hr (GC-1/-2) up to 4 hr (sperm)	0.15, 1.5	Penicillamine	↑ROS (GC-1/-2) ↑8-OHdG (sperm)	◆DNA ↓sperm quality (4 W/kg)
Jooyan, Goliaei et al. 2019	CHO	Hamster	Ovaries	900 GSM	12, 24 hr	0.3	None	↑ROS (remaining elevated 12 hrs after stop)
Kahya, Naziroglu et al. 2014	MDA-MB-231	Human	Breast cancer	900	1 hr	0.36	Selenium	↑ROS	↑APOP, ↑C3, ↑C9
Kang, Lee et al. 2014	NIH3T3 U87 PC12 SH-SY5Y	Mouse Human Rat Human	Fibroblast Glioma pheochromocytoma brain/neuroblastoma	837 + 1950	2 hr (measured 1, 3, 6, 12 hr after exposure)	2 + 2	menadione, H2O2	↑ROS (varied by time and cell)
Kazemi, Mortazavi et al. 2015	Primary	Human	Monocytes, lymphocytes	900	2 hr	ND	None	↑ROS (monocytes)
Kim, Kim et al. 2017	HT22	Mouse	Hippocampus	1950	2 hr	2,4,6	Glutamate (inducer of OS), N-acetyl-L-cysteine	↑ROS	↑CC
Koohestani, Zavareh et al. 2019	Preantral follicles	Mouse	Ovaries	1900a	1 hr/day for up to 12 days	0.77-0.88	None	↑MDA, ↓SOD, ↓TAC ↓GPx, ↓CAT
Lasalvia, Scrima et al. 2018	Lymphocytes, Monocytes	Human	Peripheral blood	1800	1 to 20 hr	0.21	None	↑ROS, ↓CCO	↑OCR
Lee, Kim et al. 2016	HT22	Mouse	Hippocampus	837 + 1950	2 hr (examined 24 hr after exposure)	2 + 2	N-acetylcysteine	◆ROS, ◆GSH	◆Aβ-induced cytotoxicity
Li, Ma et al. 2018	GC-2	Mouse	Spermatocytes	1800	24 hr	4	Melatonin	↑ROS	↑DNA
Lin, Wu et al. 2017	TM3	Mouse	Leydig	1950	24 hr, then evaluated at day 1-5	3	None	◆ROS	↓CP, ↑CC, ◆APOP, ↓T
Liu, Duan et al. 2013	GC-2	Mouse	Spermatocytes	1800	24 hr	1,2,4	Alpha-tocopherol	↑ROS, ↑oxDNA, ↑8-OHdG	◆DNA
Liu, Zhang et al. 2014	GC-2	Mouse	Spermatocytes	1800	12, 24, 48 hr	1,2,4	N-acetyl-L-cysteine	↑ROS	↑APOP, ↑PIC
Lopez-Furelos, Salas-Sanchez et al. 2018	RAW 264.7	Mouse	Macrophage	900 and/or 2450	4, 24, 48, 72 hr	0.084-0.406	None	↑NO	↓phagocytosis
Lu, He et al. 2014	N9 C8-D1A	Mouse	Microglia Astrocytes	1800	1,3,6,12,24 hr	2	None	↑NO, ↑CCO	↑PIC
Lu, Huang et al. 2012	Primary	Human	Peripheral blood monocytes	900	1, 2, 4, 6, 8 hr	0.43	None	↑ROS	↑C3, ↑APOP
Luukkonnen, Hakulinen et al. 2009	SH-SY5Y	Human	Brain/neuroblastoma	872 GSM/CW	1 hr	5	Menadione	◆ROS ↑ROS (+ menadione)	◆DNA, ◆APOP ↑DNA (CW + menadione)
Luukkonnen, Juutilainen et al. 2010	SH-SY5Y	Human	Brain/neuroblastoma	872 GSM/CW	1 hr (3 hr for DNA)	5	Ferrous Chloride	◆ROS	◆DNA, ◆APOP
Marjanovic Cermak, Pavicic et al. 2017	V79	Hamster	Lung Fibroblasts	1800	10, 30, 60 min	1.6	None	↑ROS (60 min), ↓GSH (10 min), ◆MDA, ◆GPx
Marjanovic Cermak, Pavicic et al. 2018	SH-SY5Y	Human	Brain/neuroblastoma	1800	10, 30, 60 min	1.6	None	↑ROS, ↑PCG, ↑↓GSH, ↑MDA,
Marjanovic, Pavicic et al. 2015	V79	Hamster	Lung Fibroblasts	1800	10, 30, 60	1.6	None	↑ROS (10 min), ◆PCG
Nakatani-Enomoto, Okutsu et al. 2016	Spermatozoa	Human	Sperm	1950	1 hr	2,6	None	◆8-OHdG	◆sperm quality
Naziroglu, Cig et al. 2012	HL-60	Human	Leukemia	2450	1, 2, 12, 24 hr	0.1	None	↑LP, ◆GST	↑CA
Ni, Yu et al. 2013	HLE B3	Human	Lens epithelium	1800	0.5, 1, 1.5 hr or 6, 12, 24 hr	2, 3, 4	None	↑ROS, ↑MDA, ↓SOD1/2, ↓GPx, ↓CAT	↓CP
Ozsobaci, Ergun et al. 2020	HEK293	Human	Kidney	2450	1 hr	ND	Zn	↑MDA, ↓SOD	↑APOI, ↑C3
Pastaci Ozsobaci, Duzgun Ergun et al. 2018	HEK293	Human	Kidney	2400	1 hr	ND	None	↑MDA, ↓SOD, ↓GPx	↑C3, ↑APOI
Poulletier de Gannes, Haro et al. 2011	SHSY-5Y U87 CHME5	Human	Brain/neuroblastoma Glioma Microglia	1800	1 and 24 hr evaluated 0 (24 h) and 24 hr (1 h) after exposure	2, 10	None	◆ROS
Qin, Shen et al. 2019	Leydig Cells	Mouse	Testis	1800	1, 2 or 4 hr	0.116	CeO2 nanoparticles	↓CAT, ↑MDA, ↓TAC
Schuermann, Ziemann et al. 2020	MRC-5 HTR-8/SV40neo	Human	Lung Fibroblasts Trophoblasts	1950 GSM, UMTS, WiFi, RFID	1, 4, 24 hr	0.5, 2, 4.9	Ethyl methanesulfonate (EMS)	◆oxDNA	◆DNA, ↑DNA (UMTS + EMS)
Sefidbakht, Moosavi-Movahedi et al. 2014	HEK293T (+ luciferase gene)	Human	Embryonic kidney	940	15, 30, 45, 60, 90 min	2	None	↑ROS, ↑CAT, ↑SOD, ↓GSH,↓MDA	↑C3
Silva, Hilly et al. 2016	Primary	Human	Thyroid	900 or 895	3, 16, 65 hr, examined at different times after exposure	0.082 or 0.170	None	◆ROS	◆P53, ◆CC, ◆HSP
Sueiro-Benavides, Leiro-Vidal et al. 2020	RAW 264.7	Mouse	Makrophage	2450	24, 72 hr	0.4	Black carbon	↑NO	↑PIC, ↑APOP ↑phagocytosis
Sun, Zong et al. 2017	HL-60	Human	Leukemia	900	4 hr/d, 5 days (evaluate 30 min, 4 hr and 24 hr after exposure)	2.5E-4 to 4.1E-4	Melatonin	↑ROS, ↑8-OHdG	↑mtDNA
Tsoy, Saliev et al. 2019	Astrocytes	Human, Rat	Brain	918	24 hr	0.2	Ab42, H2O2	↓ROS
Vasan and Veerachari 2012	Primary	Human	Sperm	900a	1 hr	1.46	None	↑ROS
von Niederhausern, Ducray et al. 2019	SH-SY5Y	Human	Brain/neuroblastoma	935	2 hr	1,2,4	None	◆GSH	OCR effects under glucose starvation
Wang, Liu et al. 2015	Neuro-2a	Mouse	Neuroblastoma	900	24 hr	0.5, 1, 2	None	↑ROS (2 W/kg)	◆DNA
Wang, Yang et al. 2020	MC363-E1	Mouse	Osteoblast	2450a	30, 60, 90, 120, 180 min	0.16, 0.84	Vitamin C	↑ROS, ↓GSH (> 90 min)
Xing, Zhan et al. 2016	NIH/3T3 U-87 MG	Mouse Human	Embryo Glioma	1800	3, 6, 12, 24, 48 hr	ND (1209 mW/ m2)	N-acetyl-L-cysteine	↑ROS	↑C3, ↑APOP, ↑P53
Xu, Chen et al. 2013	Primary FL HUVEC HLEC (SRA01) HSF CHL	Rat Human Hamster	Astrocytes Amniotic cells (H) Umbilical vein (H) Lens epithel Skin fibroblasts Lung	1800	1, 6, 12, 24 hr (different assays)	3	None	◆ROS (HSF)	↑DNA (HSF, CHL) ◆DNA (astrocytes, FL, HUVEC, HLEC) ◆CP (HSF)
Xu, Zhou et al. 2010	primary	Rat	Cortical neurons	1800 GSM	24 hr (intermitted 5/10 min)	2	melatonin	↑ROS, ↑8-OHdG	↑mitochondrial damage
Zielinski, Ducray et al. 2020	SH-SY5Y N9	Human Mouse	Brain/neuroblastoma	935	2, 6, 10, 24 hr (depending on measure)	4	None	↑GSH (6h), ↑ROS (24 h), ↓CCO (2 hr) in SH-SY5Y	◆APOP
Zuo, Hu et al. 2015	Primary	Rat	Neonatal spinal ganglia neurons	1800	24 hr	2, 4	None	↑ROS (4 W/Kg)	◆DNA

## Sheet: S3. ELF-MF animal studies
Reference	Species	Strain	Organ	Frequency (Hz)	Regimen	Dose (µT)	Antioxidant	Oxidative Stress Markers	Tissue Impact
Akdag, Dasdag et al. 2010	Rat	SD	Brain	50	2 hr/day, 10 months	0.231	None	↓SOD, ↑MDA
Bediz, Baltaci et al. 2006	Rat	SD	Brain; Plasma	50	5 minutes / 2nd. Day, 6 months	100	None	↑LP, ↑GSH
Cho, Nam et al. 2012	Rat	SD	Brain	50	5 days	2000	None	↑NO, ↑NOS	◆TT
Chu, Lee et al. 2011	Rat	SD	Brain	40	3 hrs	2300	None	↑LP (30 min.), ◆LP (60 min), ◆ROS ↑NOS
Ciejka, Kleniewska et al. 2011	Mouse	Balb/C	Brain	60	30 or 60 minutes/day, 2 weeks	7000	None	↑MDA, ↑ OD (cerebellum), ↑ROS, ◆GPx, ◆GSH
Deng, Zhang et al. 2014	Mouse	Kumming	Brain	50	4 hrs/day, 8 weeks	2000	None	↑CAT (100 + 500 µT), ◆LP, ◆SOD , ◆GPx (50 µT),↑LP, ↑OD, ↑GPx (100 µT, Hippocampus, cerebellum, cortex)	↑TT, ↑SM
Erdal, Gürgül et al. 2008	Rat	Wistar	Liver	50	4 hrs/day, 45 days	1000	None	◆MDA (male, female), ↑3-NT (female, ◆ male)
Falone, Mirabilio et al. 2008	Rat	SD	Brain	50	10 days	100	None	↑SOD2 (young rats), ↓SOD (young rats), ◆GSTRe (aged rats), ◆GPx (aged rats), ◆GST (aged ras), ↓CAT (aged rats)
Jelenkovic, Janac et al. 2006	Rat	Wistar	Brain	50	7 days	500	None	↑ROS, ↑SOD, ↑NO, ↑MDA
Manikonda, Rajendra et al. 2014	Rat	Wistar	Brain	50	90 days	50, 100, 500	None	↑CAT(100 + 500 µT), ◆LP, ◆SOD , ◆GPx (50 µT), ↑LP, ↑SOD, ↑GPx (100 µT, Hippocampus, cerebellum, cortex)
Martinez-Samano,Torres-Duran et al. 2010	Rat	Wistar	Plasma, liver, kidney, heart	60	2 hrs	2500	None	↓GSH (heart, liver), ↓SOD (plasma), ◆CAT	effects increased with movement restrainment
Yokus, Cakir et al. 2005	Rat	Wistar	Blood	50	3 hrs/day, 50 and 100 days	970	None	↑8-OHdG, ↑LP
Yokus, Naziroglu et al. 2008	Rat	SD	Blood	50	2 hrs/day, 10 month	100, 500	None	↑8-OHdG, ↑FapyGua, ↑FapyAde

## Sheet: S4 ELF-MF cell studies
Reference	Cell Line	Source	Organ/tissue	Frequency (Hz)	Time	Dose (mT)	Antioxidant/ co-treatment	Oxidative stress markers	Other results
Akan, Aksu et al. 2010	THP-1	Human	leukemic monocytes	50	1-6 hr	1	Staphylococcus aureus, IFg/LPS	↑NO, ◆iNOS	↑HSP, ↑cGMP altered pathogene response
Ayşe, Zafer et al. 2010	K562	Human	leukemic myelocytes	50	1 hr or 1 hr daily for 4 days	5	None	◆ROS	inhibited/enhanced differentiation for 1x/4x exposures
Benassi, Filomeni et al. 2015	SH-SY5Y	Human	Brain/neuroblastoma	50	1-3 days	1	N-acetyl-L-cysteine, MPTP	↑ROS, ↑PCG	◆APOP, ◆CP enhanced MPTP toxicity
Brisdelli, Bennato et al. 2014	K562	Human	leukemic myelocytes	50	1-3 days	1	Quercetin	◆ROS	◆APOP, ◆CP decreased querceptin toxicity
Bułdak, Polaniak et al. 2012	AT478	Mouse	vaginal mucosa carcinom	50	16 min (assessed 24, 48, 72 hr) 6, 24, 72 hr (ROS)	1	Cisplatin	↑ROS, ↑SOD, ↓MDA, ↑GPx	↑DNA changed response to cisplatin
Calcabrini, Mancini et al. 2017	NCTC-2544	Human	keratinocytes	50	1-4 hr	0.025, 0.05, 0.1, 0.15, 0.2	None	↑ROS (0.05/0.1 mT, 1/2 hr) fluctuating OS Markers
Chen, Hong et al. 2014	MEF	Mouse	embryonic fibroblasts	50	6 hr (assessed 0.5, 2, 6, 12, 24 hr post exposure)	2	Rapamycin	↑ROS (2, 6 hr post exposure)	◆APOP ↑autophagy
Consales, Cirotti et al. 2018	SH-SY5Y	Human	Brain/neuroblastoma	50	up to 72 hr	1	N-acetyl-L-cysteine	↑ROS	↑miR-34b/c expression mitochondrial damage
Consales, Panatta et al. 2019	SH-SY5Y	Human	Brain/neuroblastoma	50	up to 72 hr	1	None	◆ROS	SOD OE reduces EMF effects
Costantini, Sinjari et al. 2019	primary	Human	gingival fibroblast	50 (pulsed 12 Hz)	6, 18 hr	1	None	↑iNOS (6 hr) ↑HO-1 (18 hr)	↑CP improved wound healing
de Groot, Kock et al. 2014	PC12	Rat	pheochromocytoma	50	up to 48 hr	0.001, 0.01, 0.1, 1	Dexamethasone, L-Dopamin, FeSO4	◆ROS	◆CA no neurotoxic effects
Duan, Liu et al. 2015	GC-2	Mouse	spermatogenic cells	50 (1800 MHz)	24 hr	1, 2, 3	None	◆oxDNA (3 mT)	◆APOP, ↑DNA
Duong and Kim. 2016	HMO6	Human	microglia	50 (10/100)	4 hr	0.01, 0.1, 1	Oxygen and glucose deprivation	↓ROS	protective role after oxygen-glucose deprivation
Falone, Santini et al. 2017	SH-SY5Y	Human	Brain/neuroblastoma	50	5, 10 days	1 0.1	None	↑GST, ↓PCG, ↑GPx, ↑CAT	↓DNA, ↑NRF2 H2O2 cytotoxicity protection
Feng, Dai et al. 2016	FL	Human	amniotic epithelial cells	50	5, 15, 30, 60 min	0.1, 0.2, 0.4	None	↑ROS (5-30 min, 0.2/0.4 mT)	↑ EGFR clustering
Feng, Qiu et al. 2016	FL	Human	amniotic epithelial cells	50	5, 15, 30, 60 min	0.4	N-acetyl-L-cysteine	↑ROS (5-30 min)	↓CA, ↑CCO
Feng, Ye et al. 2016	FL	Human	amniotic epithelial cells	50	30, 60, 120 min	0.4	None	↑ROS	◆APOP, ↑MAPK signalling
Frahm, Mattsson et al. 2010	primary	Mouse	macrophages	50	5, 15, 30, 45 min	1	TPA, LPS	↑ROS (45 min), ↑NOX	modulates TPA/LPS response
Hong, Han et al. 2012	MCF10A	Human	mammary epithel	60	4 h (assessed 10-48 h after)	1	None	◆ROS, ◆GSH, ◆SOD
Höytö, Herrala et al. 2017	SH-SY5Y	Human	Brain/neuroblastoma	50	24 hr	0.1	Menadione, blue light	↑ROS (cytosolic) ↓ROS (mitochondrial)	◆APOP, ◆DNA co-exposure effects
Jeong, Kim et al. 2017	BM-MSC	Human	bone marrow stem cells	50	12 days	1	None	↑ROS	promotion of astrocyte differentiation
Kesari, Juutilainen et al. 2016	SH-SY5Y	Human Rat	Brain/neuroblastoma	50	24 hr	0.01, 0.03	Menadione	↑ROS (co-treatment) ◆ROS (ELF-MF alone)	◆APOP, ◆DNA
Kesari, Luukkonen et al. 2015	SH-SY5Y	Human	Brain/neuroblastoma	50	24 hr (assessed 15, 30, 45 days later)	0.1	N-acetyl-L-cysteine, menadione	◆ROS, ◆LP	↑DNA
Kim, Jang et al. 2017	RAW 264.7	Mouse	macrophage	60	10, 20 hr	0.8	LPS	↑NO (LPS) ◆NO (ELF-MF alone)	↑PIC, ◆CP, ◆phagocytosis
Lekovic, Drekovic et al. 2020	MRC-5	Human	lung fibroblast	50	1/2/3/7 days	10	None	↓NO (day 1-3), ↑NO (day7) ↓↑◆ROS/GSH/CAT, ◆SOD, ↑GST/GSHRe/GPx
Luukkonen, Liimatainen et al. 2014	SH-SY5Y	Human	Brain/neuroblastoma	50	24 hr (assessed 3 hr after exposure or later)	0.1	Menadione	↑ROS (mitochondrial), ↓LP	↑DNA
Mannerling, Simkó et al. 2010	K562	Human	leukemic myelocytes	50	1 hr	0.025, 0.05, 0.1	melatonin, 1,10-phenantroline	↑ROS	↑HSP, ◆CP
Martínez, Úbeda et al. 2016	NB69	Human	Brain/neuroblastoma	50	24, 42, 62 hr 15-120 min	0.1	N-acetyl-L-cysteine		↑CP, ↑signaling effects blocked by ROS scavenger
Morabito, Guarnieri et al. 2010	PC12	Rat	pheochromocytoma	50	30 min or 7 days	0.1, 1	None	↑ROS (1 mT), ↓CAT ◆ROS (differenting)	◆CP, ↓CA changed differentiation
Nakayama, Nakamura et al. 2016	RAW 264.7	Mouse	macrophage	50	24 hr	0.5	LPS	◆NO	◆DNA, ◆APOP interaction with LPS
Park, Seo et al. 2013	BM-MSC	Human	bone marrow stem cells	50/100	30-180 min or up to 8 days	1	N-acetyl-L-cysteine	↑ROS (90 min)	ROS-mediated differentiation ↑EGF/Akt signaling
Patruno, Amerio et al. 2010	HaCaT	Human	keratinocytes	50	3, 18, 48 hr	1	LPS	↑NO, ↑iNOS (1 hr), ↓ROS	↑CP
Patruno, Costantini et al. 2020	THP-1	Human	leukemic monocytes	50	1/6/24 hr	1	LPS	↑↓ROS, ↑↓HO-1 ↑↓GSH/GPx/GSHRe	↑Akt/Erk/NRF2 signaling
Patruno, Pesce et al. 2012	THP-1	Human	leukemic monocytes	50	24 hr	1	LPS	↑iNOS, ↑ROS, ↓SOD/CAT, ↑3-NT
Patruno, Tabrez et al. 2015	K562	Human	leukemic myelocytes	50	1-24 hr	1	PMA	↑CAT (1, 3 hr)	↑CYP-450 modulation of PMA effect
Provenzano, Amatori et al. 2018	NB4	Human	leukemic promyelocytes	50	up to 96 hr	2	All-trans retinolic acid (ATRA) N-acetyl-L-cysteine	↑ROS (with ATRA)	◆CP, enhanced ATRA differentiation
Reale, D'Angelo et al. 2016	SH-SY5Y	Human	Brain/neuroblastoma	50	1, 3, 24, 48 hr	1	None	↑ROS (1, 3 hr), ↑HO-1 (3 hr)	↑cytokines
Reale, Kamal et al. 2014	SH-SY5Y	Human	Brain/neuroblastoma	50	1, 3, 6, 24 hr	1	None	↑ROS, ↓CAT (6 hr) ↑nNOS	↑cytokines
Solek, Majchrowicz et al. 2017	GC-1, GC-2	Mouse	spermatogenic cells	50 (2/150 and pulsed)	2 hr (assessed 48 hr later)	2.5 - 8	None	↑ROS (GC-1), ◆NO	◆APOP, ◆metabolic activity
Solek, Majchrowicz et al. 2018	GC-1	Mouse	spermatogenic cells	50 (50 Hz pulsed)	2 hr (assessed 48 hr later)	2.5	None	↑ROS (GC-1), ◆NO	↑P53, ↑CC ◆APOP, ◆metabolic activity
Song, Im et al. 2018	HeLa IMR-90	Human	cervix carcinoma lung fibroblast	60	10, 30, 60 min repeated or continous for days	1, 3, 6, 10	None	↓ROS	↑CP, ↑Akt/Erk signaling
Sun, Chen et al. 2018	FL	Human	amniotic epithel	50	5, 15, 30 min	0.4	N-acetyl-L-cysteine pyrrolidine dithiocarbamate	↑ROS	↑ EGFR clustering
Villarini, Gambelunghe et al. 2017	SH-SY5Y SK-NB-E-2	Human	Brain/neuroblastoma	50	1 hr (continous) 5 hr (intermittent, 15/15 min)	0.01, 0.1, 1	AlCl3	◆GSH	◆HSP, ◆DNA
Wang, Liu et al. 2019	AC16	Human	cardiomyocyte	50	1 hr (continous) 1.25 hr (intermittent, 15/15 min)	0.1	None	◆ROS, ◆GSH	◆DNA, ◆P53, ◆HSP
Wang, Zhang et al. 2018	HCT116 HEK-293T RPE-1 Gist-T1 & others	Human	colon carcinoma kidney retina epithel gastrointestinal stromal	50 Hz (static, 120)	2 hr (4, 6 hr)	6	None	↑ROS (HCT116) ↓ROS (RPE-1) ◆ROS (Gist-T1, HEK-293T)	altered ATP level in some conditions/cell lines
Xu, Wang et al. 2020	MCF-7 ZR-75-1 T47D	Human	breast cancer	50 (125, 200, 275)	6, 12, 24, 36 hr	1	N-acetyl-L-cysteine	↑ROS (200 Hz)	↓CP (all frequencies), ↑APOP/CC (200 Hz)
Zeng, Shen et al. 2017	primary	Rat	hippcampal neurons	50	0.5, 8, 24 hr 0.5, 8 hr/day repeated	2	None	↑ROS (older neurons) ◆ROS (younger neurons) ↑Nox2 (8 hr/day)	↓CP, ◆DNA, ◆APOP
